# Supplementary material
Source: HighWire-hosted journal article supplement (https://pn.bmj.com/highwire/filestream/149051/field_highwire_adjunct_files/0/practneurol-2021-002989supp001_data_supplement.pdf)
Supplement: practneurol-2021-002989supp001_data_supplement.pdf [file practneurol-2021-002989supp001_data_supplement.pdf]

Supplementary Table 1: UK gene testing for ALS/MND

|                                  | Gene                                                                              | OMIM*  | Inheritance | Chromosome      | Penetrance | Variant details                  | ALS clinical traits                                                                                                                             | Other associated disorders                                                                             |
|----------------------------------|-----------------------------------------------------------------------------------|--------|-------------|-----------------|------------|----------------------------------|-------------------------------------------------------------------------------------------------------------------------------------------------|--------------------------------------------------------------------------------------------------------|
|                                  | <i>C9ORF72</i> (chromosome 9 open reading frame 72)                               | 614260 | AD          | <i>9p21.2</i>   | Incomplete | STR:G4C2<br>N: ≤30<br>Abn#: >100 | Mainly of European (North>South) ancestry; Younger adult onset, rapid progression, extra-motor symptoms common (cognitive, psychiatric)→ALS-FTD | Dementias: FTD (bv, PPA), AD; Parkinsonism (typically akinetic rigidity without tremor); Schizophrenia |
| <b>ALS/MND sequencing slice:</b> |                                                                                   |        |             |                 |            |                                  |                                                                                                                                                 |                                                                                                        |
| 1                                | <i>ALS2</i> ( <i>KIAA1563</i> , <i>ALSIN</i> )                                    | 606352 | AR          | <i>2q33.1</i>   | Complete   | Never reported in adult patients | Mainly of Arabic ancestry; Juvenile onset, long ddx, often no bulbar/respiratory sx                                                             | jPLS; jHSP                                                                                             |
| 2                                | <i>ANG</i> (angiogenin)                                                           | 105850 | AD          | <i>14q11.2</i>  | Complete   |                                  |                                                                                                                                                 | Parkinsonism; FTD                                                                                      |
| 3                                | <i>ANXA11</i> (annexin XI)                                                        | 602572 | AD          | <i>10q22.3</i>  | Incomplete | 4 mutations **                   | Classic ALS phenotype                                                                                                                           |                                                                                                        |
| 4                                | <i>CCNF</i> (cyclin F)                                                            | 600227 | AD          | <i>16p13.3</i>  | Incomplete |                                  | ALS, ALS-FTD                                                                                                                                    | FTD                                                                                                    |
| 5                                | <i>CHCHD10</i> (coiled-coil-helix-coiled-coil-helix domain-containing protein 10) | 615903 | AD          | <i>22q11.23</i> | Complete   |                                  | FTD-ALS                                                                                                                                         | FTD; Mitochondrial myopathy, SMA (Jokela type)                                                         |
| 6                                | <i>CHMP2B</i> (charged multivesicular body protein 2B)                            | 609512 | AD          | <i>3p11.2</i>   | Complete   |                                  | LMN-predominant ALS phenotypes; FTD-ALS                                                                                                         | FTD                                                                                                    |
| 7                                | <i>FIG4</i> (FIG4 phosphoinositide 5-phosphatase)                                 | 609390 | AD          | <i>6q21</i>     | Complete   |                                  |                                                                                                                                                 | AR: CMT-4J                                                                                             |
| 8                                | <i>FUS/TLS</i> (fused in sarcoma/translated in liposarcoma)                       | 137070 | AR<br>AD    | <i>16q11.2</i>  | Complete   |                                  | Juvenile onset; Heterogenous phenotype                                                                                                          | Essential tremor type 4                                                                                |
| 9                                | <i>HNRNPA1</i> (heterogeneous nuclear ribonucleoprotein A1)                       | 164017 | AD          | <i>12q13</i>    | Complete   |                                  |                                                                                                                                                 | IBMPFD                                                                                                 |
| 10                               | <i>OPTN</i> (optineurin)                                                          | 602432 | AD<br>AR    | <i>10p13</i>    | Complete   |                                  | Mainly in Japan                                                                                                                                 | AD: Glaucoma 1, open angle, E                                                                          |
| 11                               | <i>PFN1</i> (profilin-1)                                                          | 176610 | AD          | <i>17p13.2</i>  | Incomplete |                                  |                                                                                                                                                 |                                                                                                        |
| 12                               | <i>SETX</i> (senataxin)                                                           | 608465 | AD          | <i>9q34.13</i>  | Complete   |                                  | Juvenile onset; very slow progression (normal lifespan), no bulbar/ respiratory sx                                                              | dHMN;<br>AR: SCAR1; AOA2                                                                               |
| 13                               | <i>SOD1</i> (superoxide dismutase 1)                                              | 147450 | AR<br>AD    | <i>21q22.11</i> | Complete   | >200 mutations**                 | Younger onset; longer ddx, LL-onset; rare to have cognitive sx                                                                                  | AR: Spastic tetraplegia and axial hypotonia                                                            |
| 14                               | <i>SPG11</i> (spatacsin)                                                          | 610844 | AR          | <i>15q21.1</i>  | Complete   |                                  | Juvenile onset (<25yrs); slowly progressive, prolonged survival (>3 decades)                                                                    | CMT-2X; HSP+-TCC                                                                                       |
| 15                               | <i>SQSTM1</i> (sequestosome 1)                                                    | 601530 | AD          | <i>5q35.3</i>   | Complete   |                                  | ALS-FTD                                                                                                                                         | FTD; Distal myopathy, Paget disease of the bone                                                        |

|    |                                                                |        |    |                 |            |                           |                                                                                  |                               |
|----|----------------------------------------------------------------|--------|----|-----------------|------------|---------------------------|----------------------------------------------------------------------------------|-------------------------------|
| 16 | <i>TARDBP</i> (TAR DNA-binding protein 43)                     | 605078 | AD | <i>1p36.22</i>  | Incomplete | Polygenic                 | Mainly of Sardinian ancestry;<br>ALS-FTD                                         | FTD                           |
| 17 | <i>TBK1</i> (TANK-binding kinase 1)                            | 604834 | AD | <i>12q14.2</i>  | Incomplete | Not frequent              | ALS-FTD                                                                          | FTD                           |
| 18 | <i>UBQLN2</i> (Ubiquilin-2)                                    | 300264 | XL | <i>Xp11.21</i>  | Complete   |                           | Typically in males, if in females<br>may be less severe, later onset;<br>ALS-FTD |                               |
| 19 | <i>VAPB</i> (vesicle-associated membrane protein B angiogenin) | 605704 | AD | <i>20q13.32</i> | Complete   | P56S mutation<br>(mainly) | Longer ddx                                                                       | SMA (late onset, Finkel type) |
| 20 | <i>VCP</i> (valosin-containing protein)                        | 601023 | AD | <i>9p13.3</i>   | Complete   | Rare (<2%)                | ALS-FTD                                                                          | CMT-2Y (axonal); HSP; IBMPFD  |

In the UK, the genetic sequencing slice for ALS/MND is available as part of the Adult-Onset Neurodegeneration panel (R58.1, NHS Genomic Medicine Service v2.178) if testing for *C9ORF72* is negative. This contains 20 genes with a “high level of diagnostic evidence” for ALS and comprises whole genome sequencing (WGS phase 2, 2021), short tandem repeats (STRs), and curated regions (copy number variations). ALS/MND gene testing panels differ across countries according to clinical laboratory and regional practice (e.g., the College of American Pathologists accredit a 35-panel test across North and South America, Europe, Australia and the Middle East; while Centogene (Germany) offer a 22-panel test). Row colours separate mode of inheritance: AD, autosomal dominant (blue); AR, autosomal recessive (orange); XL, X-linked (green); Abn, abnormal range; ALS, amyotrophic lateral sclerosis; ALS-FTD, amyotrophic lateral sclerosis with frontotemporal dementia; AOA2, ataxia with oculomotor apraxia type 2; bv, behavioural variant FTD; CMT, Charcot-Marie-Tooth disease; ddx, disease duration; dHMN, distal hereditary motor neuropathy; FTD, frontotemporal dementia; HSP, hereditary spastic paraplegia; HSP+, complicated hereditary spastic paraplegia (HSP-plus); IBM, inclusion body myositis; IBMPFD, inclusion body myopathy with Paget Disease and Frontotemporal Dementia; j, juvenile; LL, lower-limb; N, normal range; PPA, primary progressive aphasia (language variant FTD); PLS, primary lateral sclerosis; SCAR1, autosomal recessive spinocerebellar ataxia with axonal neuropathy; SMA, spinal muscular atrophy; sx, symptom(s); TCC, thin corpus callosum. \*Gene/locus MIM number; #, no validated or exact cut-off length for pathogenicity, but usually >100; \*\*pathogenicity not proven for all mutations (SOD1: [www.alsod.ac.uk](http://www.alsod.ac.uk)).
